# Supplementary material for: Associations between oral processing, saliva, and bolus properties on daily glucose excursions amongst people at risk of type-2 diabetes
Source: Royal Society of Chemistry journal article supplement (doi:10.1039/d2fo03060h), 2023-01-01
Supplement: d2fo03060h1.pdf [file d2fo03060h1.pdf]

## Supplemental Table Legends

**Supplemental Table 1.** R-squared values of GEE models evaluating univariate associations of different independent variable with daily percentage Time Above Range (TAR) for glucose over a 7-day period.

**Supplemental Table 2.** R-squared values of GEE models evaluating associations of different Bolus saliva uptake with daily percentage Time Above Range (TAR) for glucose over a 7-day period, adjusting for other factors.

**Supplemental Table 1.** R-squared values of GEE models evaluating univariate associations of different independent variable with daily percentage Time-Above-Range (TAR) for glucose over a 7-day period.

| <b>Independent variable</b>                                                        | <b>Model R-squared, with one fixed factor (%)</b> |
|------------------------------------------------------------------------------------|---------------------------------------------------|
| <b>Bolus saliva uptake (%)</b>                                                     | 12.8                                              |
| <b>Stimulated Salivary Amylase Activity (U/ml)</b>                                 | 2.8                                               |
| <b>Saliva flow rate (g/min)</b>                                                    | 0.3                                               |
| <b>Average particle size (mm<sup>2</sup>)</b>                                      | 1.3                                               |
| <b>Total surface area (mm<sup>2</sup>)</b>                                         | 0.5                                               |
| <b>Saliva incorporation rate SIR (g/min)</b>                                       | 3.5                                               |
| <b>Bite size (g/bite)</b>                                                          | 4.2                                               |
| <b>Time in mouth (secs)</b>                                                        | 3.3                                               |
| <b>Eating rate (kcal/min)</b>                                                      | 2.2                                               |
| <b>BMI (kg/m<sup>2</sup>)</b>                                                      | <0.1                                              |
| <b>Carbohydrates (energy %)</b>                                                    | <0.1                                              |
| <b>Sugar (energy %)</b>                                                            | 0.7                                               |
| <b>Daily 10-minute-bouted moderate-to-vigorous physical activity (minutes/day)</b> | 1                                                 |
| <b>Total daily moderate-to-vigorous physical activity (hours/day)</b>              | 0.8                                               |

**Supplemental Table 2.** R-squared values of GEE models evaluating associations of different Bolus saliva uptake with daily percentage Time-Above-Range (TAR) for glucose over a 7-day period, adjusting for other factors.

| <b>Independent variables</b>                                                                                 | <b>Model R-squared, with multiple fixed factors (%)</b> |
|--------------------------------------------------------------------------------------------------------------|---------------------------------------------------------|
| <b>Bolus saliva uptake (%) and BMI (kg/m<sup>2</sup>)</b>                                                    | 13.2                                                    |
| <b>Bolus saliva uptake (%) and Carbohydrates (energy %)</b>                                                  | 13.5                                                    |
| <b>Bolus saliva uptake (%) and Sugar (energy %)</b>                                                          | 14.7                                                    |
| <b>Bolus saliva uptake (%) and Daily 10-minute-bouted moderate-to-vigorous physical activity (hours/day)</b> | 12.5                                                    |
| <b>Bolus saliva uptake (%) and Total daily moderate-to-vigorous physical activity (hours/day)</b>            | 12.8                                                    |
